# Supplementary material for: BugSigDB captures patterns of differential abundance across a broad range of host-associated microbial signatures
Source: bioRxiv or medRxiv preprint supplement (doi:10.1101/2022.10.24.22281483), 2023-07-18
Supplement: Supplementary file [file media-1.pdf]

# BugSigDB: accelerating microbiome research through systematic comparison to microbial signatures

Ludwig Geistlinger, Chloe Mirzayi, Fatima Zohra, Rimsha Azhar, Shaimaa Elsafoury, Clare Grieve, Jennifer Wokaty, Samuel David Gamboa-Tuz, Pratyay Sengupta, The BugSigDB Curation Team, Aarthi Ravikrishnan, Rafael Gonçalves, Eric Franzosa, Karthik Raman, Vincent Carey, Jennifer Dowd, Heidi Jones, Sean Davis, Nicola Segata, Curtis Huttenhower, Levi Waldron

**Supplementary Material**

## Contents

|                                             |          |
|---------------------------------------------|----------|
| <b>S1 Supplementary Results</b>             | <b>2</b> |
| S1.1 Curated metadata in BugSigDB . . . . . | 2        |

## List of Figures

|     |                                                                               |    |
|-----|-------------------------------------------------------------------------------|----|
| S1  | Publication date of curated papers . . . . .                                  | 3  |
| S2  | Distribution of taxonomic levels . . . . .                                    | 3  |
| S3  | BugSigDB Semantic MediaWiki web interface . . . . .                           | 4  |
| S4  | Comparison of semantic similarity and Jaccard similarity . . . . .            | 5  |
| S5  | Signature similarity: antibiotics treatment . . . . .                         | 6  |
| S6  | Signature similarity: HIV infection . . . . .                                 | 7  |
| S7  | Signature similarity: COVID-19 . . . . .                                      | 8  |
| S8  | Signature similarity: Gastric cancer . . . . .                                | 9  |
| S9  | Relationship between sample size and ranking of spike-in signatures . . . . . | 10 |
| S10 | Clustering of consensus signatures for body site . . . . .                    | 11 |
| S11 | Genera with mutual exclusive abundance changes between conditions . . . . .   | 12 |

## List of Tables

|    |                                                                          |    |
|----|--------------------------------------------------------------------------|----|
| S1 | Body areas and anatomical sites . . . . .                                | 13 |
| S2 | Reported measures of alpha diversity . . . . .                           | 15 |
| S3 | Reported measures of alpha diversity . . . . .                           | 15 |
| S4 | Body sites with frequently reported changes in alpha diversity . . . . . | 15 |
| S5 | Conditions with frequently reported changes in alpha diversity . . . . . | 15 |

## S1 Supplementary Results

### S1.1 Curated metadata in BugSigDB reveals common practices in human microbiome research

BugSigDB provides curated metadata that enable stratification of microbiome signatures by study design, sample size, and evidence type (Table 1 of the main manuscript). Recorded lab analysis fields include sequencing type (16S: 92.5%; metagenomic shotgun (MGX): 7.5%) and sequencing platform (Illumina: 68%; Roche 454: 15%; Ion Torrent: 7.2%; RT-qPCR: 6.6%). Most of the 16S studies amplified the V4 region, which has implications on which taxonomic clades can be reliably detected [1, 2].

A side benefit of the database is a survey of the popularity of different statistical tests in the published literature. Non-parametric tests for testing for differences in mean microbial abundance between two sample groups (Mann-Whitney U test, 29.2%) or more than two groups (Kruskal-Wallis rank test, 8.1%) were most frequently used, often performed using the popular **LEfSe** tool (28.4%) for metagenomic biomarker discovery [3]. Considerable fractions also employed parametric tests based on the raw read counts (via **DESeq2** [4], 7.3%) or relative abundance (using a *t*-test, 6.3%) for differential abundance testing. Recently suggested tools for differential abundance tests accounting for the compositionality of microbiome data [5] were rarely used.

As differential abundance of individual microbes can also be a side effect of systematic differences in alpha diversity between the contrasted sample groups, BugSigDB records whether and which measures of alpha diversity were reported. For most experiments, alpha diversity was either unchanged (410, 33.4%) or not reported (399, 32.6%), and roughly equal numbers of experiments reported either increased (187, 15.3%) or decreased (229, 18.7%) alpha diversity in the study group. Most frequently reported measures of alpha diversity were Shannon diversity (reflecting number of species and their relative abundance, 38.3%) and richness (number of species, 22.4%, Supplementary Table S3).

## References

- [1] Schloss, P.D.: The effects of alignment quality, distance calculation method, sequence filtering, and region on the analysis of 16S rRNA gene-based studies. *PLoS Comput Biol* **6**, 1000844 (2010)
- [2] Yang, B., Wang, Y., Qian, P.Y.: Sensitivity and correlation of hypervariable regions in 16S rRNA genes in phylogenetic analysis. *BMC Bioinformatics* **17**, 135 (2016)
- [3] Segata, N., *et al.*: Metagenomic biomarker discovery and explanation. *Genome Biol* **12**, 60 (2011)
- [4] Love, M.I., Huber, W., Anders, S.: Moderated estimation of fold change and dispersion for RNA-seq data with **DESeq2**. *Genome Biol* **15**, 550 (2014)
- [5] Gloor, G.B., Macklaim, J.M., Pawlowsky-Glahn, V., Egozcue, J.J.: Microbiome datasets are compositional: and this is not optional. *Front Microbiol* **8**, 2224 (2017)
- [6] Resnik, P.: Semantic similarity in a taxonomy: an information-based measure and its application to problems of ambiguity in natural language. *J Artif Intell Res* **11**, 95–130 (1999)
- [7] Webber, W., Moffat, A., Zobel, J.: A similarity measure for indefinite rankings. *ACM Trans Inf Syst Secur* **28**, 1–38 (2010)
- [8] Mungall, C., *et al.*: Uberon, an integrative multi-species anatomy ontology. *Genome Biol* **13**, 5 (2012)

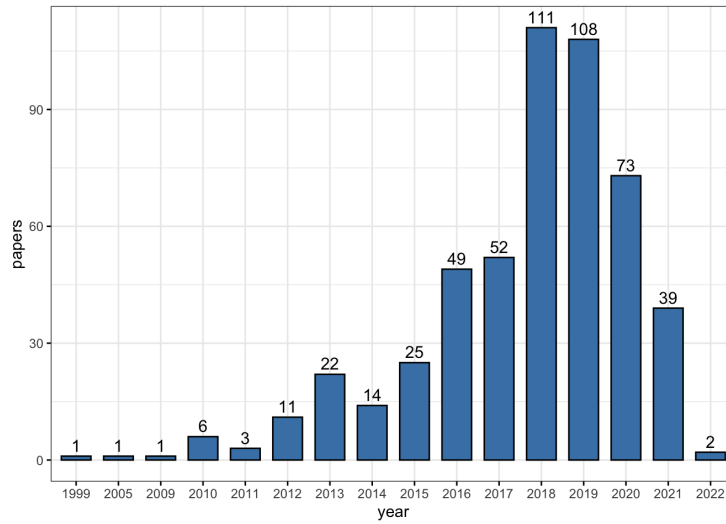

**Figure S1: Publication date of curated papers.** The curated papers cover two decades of human microbiome research, with the majority of studies being published in the last 5 years (385 / 526 studies, 73.2%).

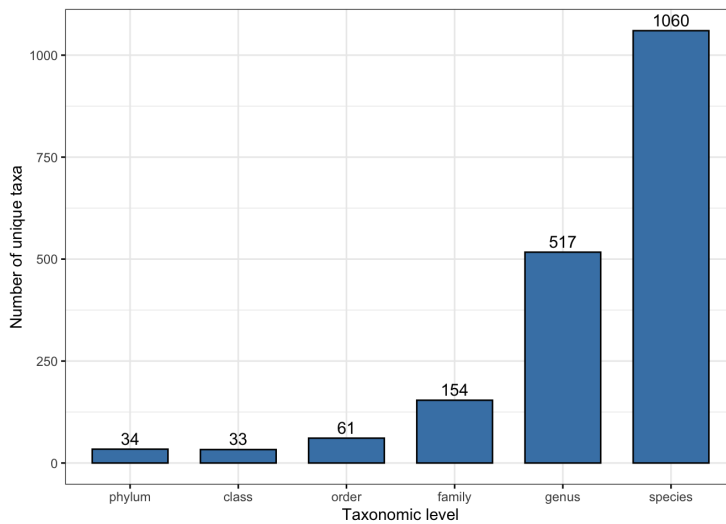

**Figure S2: Distribution of taxonomic levels in BugSigDB signatures.** Shown is the number of unique taxa (*y*-axis) for each taxonomic level on the *x*-axis.

### Study PubMed

#### The gut microbiota in conventional and serrated precursors of colorectal cancer

**Study information**

**study design** case-control Reviewed

**Citation**

PMID 28038883  
DOI 10.1186/s40168-016-0218-6  
URI  
Authors Peters BA, Dominiani C, Shapiro JA, Church TR, Wu J, Miller G, Yuan E, Freeman H, Lusterad I, Salk J, Friedlander C, Hayes RB, Ahn J  
Journal Microbiome  
Year 2016

**BACKGROUND:** Colorectal cancer is a heterogeneous disease arising from at least two precursors—the conventional adenoma (CA) and the serrated polyp. We and others have previously shown a relationship between the human gut microbiota and colorectal cancer; however, its relationship to the different early precursors of colorectal cancer is understudied. We tested, for the first time, the relationship of the gut microbiota to specific colorectal polyp types. **RESULTS:** Gut microbiota were assessed in 540 colonoscopy-screened adults by 16S rRNA gene sequencing of stool samples. Participants were categorized as CA cases (n = 144), serrated polyp cases (n = 73), or polyp-free controls (n = 323). CA cases were further classified as proximal (n = 87) or distal (n = 56) and as non-advanced (n = 121) or advanced (n = 22). Serrated polyp cases were further classified as hyperplastic polyp (HP; n = 40) or sessile serrated adenoma (SSA; n = 33). We compared gut microbiota diversity, overall composition, and normalized taxon abundance among these groups. CA cases had lower species richness in stool than controls (p = 0.03); in particular, this association was strongest for advanced CA cases (p = 0.004). In relation to overall microbiota composition, only distal or advanced CA cases differed significantly from controls (p = 0.02 and p = 0.002). In taxon-based analysis, stool of CA cases was depleted in a network of Clostridia operational taxonomic units from families Ruminococcaceae, Clostridiaceae, and Lachnospiraceae, and enriched in the classes Bacilli and Gammaproteobacteria, order Enterobacteriales, and genera Actinomyces and Streptococcus (all q < 0.10). SSA and HP cases did not differ in diversity or composition from controls, though sample size for these groups was small. Few taxa were differentially abundant between HP cases or SSA cases and controls; among them, class Erysipelotrichi was depleted in SSA cases. **CONCLUSIONS:** Our results indicate that gut microbiome may play a role in the early stages of colorectal carcinogenesis through the development of CA. Findings may have implications for developing colorectal cancer prevention therapies targeting early microbial drivers of colorectal carcinogenesis.

### Experiment

**Curated date:** 2021/01/10 Reviewed

**Curator:** WikiWorks743

**Revision editor(s):** WikiWorks743

**Subjects**

**Location of subjects** United States of America

**Host species** Homo sapiens

**Body site** feces

**Condition** adenoma

**Group 0 name** controls

**Group 1 name** conventional adenoma cases

**Group 1 definition** conventional adenoma cases; those with at least one tubular or tubulovillous adenoma and no other polyps of neoplastic, SSA, or unclassified histology. HP cases;

**Lab analysis**

**Sequencing type** 16S

**16s variable region** V4

**Sequencing platform** Illumina

**Statistical Analysis**

**Statistical test** DESeq2

**Significance threshold** 0.1

**MHT correction** Yes

**Confounders controlled for** sex, age, body mass index

### Signature

**Signature 1**

**Curated date:** 2018-09-05 Reviewed

**Curator:** Levi Waldron

**Revision editor(s):** WikiWorks743

**Source:** Table 2 + Supplemental Table S5 + S3+ S4

**Description:** Differential abundance was detected by the "DESeq" function in the DESeq2 package. All classes and genera with an FDR-adjusted q < 0.10 are included in the table. Models were adjusted for sex, age, study, and categorical BMI. See Additional file 1: Table S5 for comparisons at the phylum, order, and family level.

**Abundance in Group 1:** increased abundance in conventional adenoma cases

**NCBI:** Bacilli ; Gammaproteobacteria ; Actinomyces ; Corynebacterium ; Streptococcus ; Peptinophilus ; Dorea ; Phascolarctobacterium ; Sutterella ; Actinomyces ; Actinomycetaceae ; Alcaligenaceae ; Lachnospirales ; Streptococcaceae ; Veillonellaceae ; Enterobacteriales ; Corynebacteriaceae ; Lactococcaceae ; Bacillus ; Bacillales ;

**Revision editor(s):** WikiWorks743

**Signature 2**

**Curated date:** 2018-09-05 Reviewed

**Curator:** Levi Waldron

**Revision editor(s):** WikiWorks743

**Source:** Table 2 + Supplemental Table S5 + S3+ S4

**Description:** Differential abundance was detected by the "DESeq" function in the DESeq2 package. All classes and genera with an FDR-adjusted q < 0.10 are included in the table. Models were adjusted for sex, age, study, and categorical BMI. See Additional file 1: Table S5 for comparisons at the phylum, order, and family level.

**Abundance in Group 1:** decreased abundance in conventional adenoma cases

**NCBI:** Coprobacillus ; Cyanobacteria ;

**Revision editor(s):** WikiWorks743

### Taxon NCBI

**Genus: Coprobacillus**

100883

**Species taxa in this genus:** Coprobacillus cateniformis

**Signatures containing the Coprobacillus genus (100883) DIRECT**

| Study                                                                                                                                             | Signature   | Differential Abundance                        | Taxa                                                                                                                                                                                                                                                                                              |
|---------------------------------------------------------------------------------------------------------------------------------------------------|-------------|-----------------------------------------------|---------------------------------------------------------------------------------------------------------------------------------------------------------------------------------------------------------------------------------------------------------------------------------------------------|
| Chronic Early-life Stress in Rat Pups Alters Basal Corticosterone, Intestinal Permeability, and Fecal Microbiota during Weaning: Influence of Sex | 078-001-001 | Increased abundance in limited nesting stress | Enterococcus ; Streptococcus ; Peptococcus ; Aerococcus ; Jentergiacoccus ; Faeklamia ; Clostridium ; Corynebacterium ; Desulfotomobium ; Granulicatella ; Rothia ; Proteus ; Clostridiaceae ; Coprobacillus ; Lactococcus ; Streptococcaceae ; Enterococcaceae ; Turicibacter ; Methanosphaera ; |
| Decreased bacterial diversity characterizes the altered gut microbiota in patients with psoriatic arthritis, resembling                           | 328-002-001 | Decreased abundance in skin psoriasis         | Porphyromonadaceae ; Parabacteroides ; Clostridia ; Erysipelotrichaceae ; Erysipelotrichia ; Actinobacteria ; Actinobacteria ; Coprobacillus ; Erysipelotrichales ; Coprococcus ;                                                                                                                 |

**Figure S3: A semantic MediaWiki for microbial annotations.** Semantic MediaWiki web interface available at <https://bugsigdb.org> for data entry, semantic validation, and web-based programmatic access to annotations for individual microbes and microbe signatures. This includes dedicated pages for (a) studies annotated with study design and linked to PubMed, (b) experiments describing characteristics of enrolled study participants, experimental procedures, and statistical analysis based on established ontologies and controlled vocabulary for body site and disease condition, (c) signatures specifying curation source and direction of abundance change (increased / decreased) of (d) individual taxa annotated following the nomenclature of the NCBI Taxonomy Database, facilitating also direct comparison of entered signatures to existing signatures in the database.

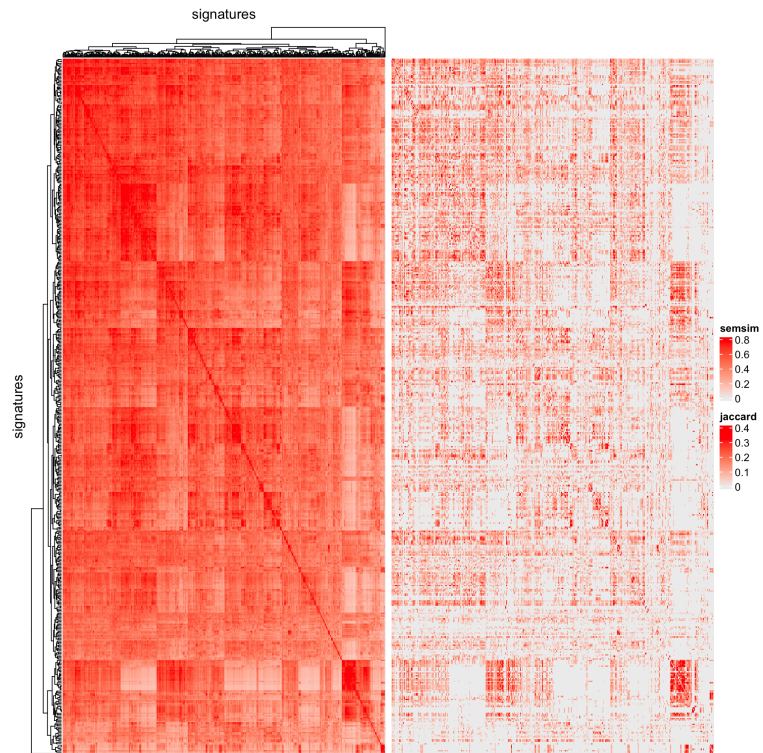

**Figure S4: Comparison of semantic similarity and Jaccard similarity.** We applied two different approaches for computing similarity between signatures: (1) the more restrictive Jaccard index based on pairwise overlaps between signatures harmonized to genus level (right panel), and (2) the more sensitive semantic similarity (left panel) based on taxonomic distance between signatures of mixed taxonomic levels (see Methods, main manuscript). Hierarchical clustering of signature similarity for both similarity measures was in good agreement, but demonstrated better resolution of semantic similarity compared to the sparse results obtained from the application of Jaccard similarity.









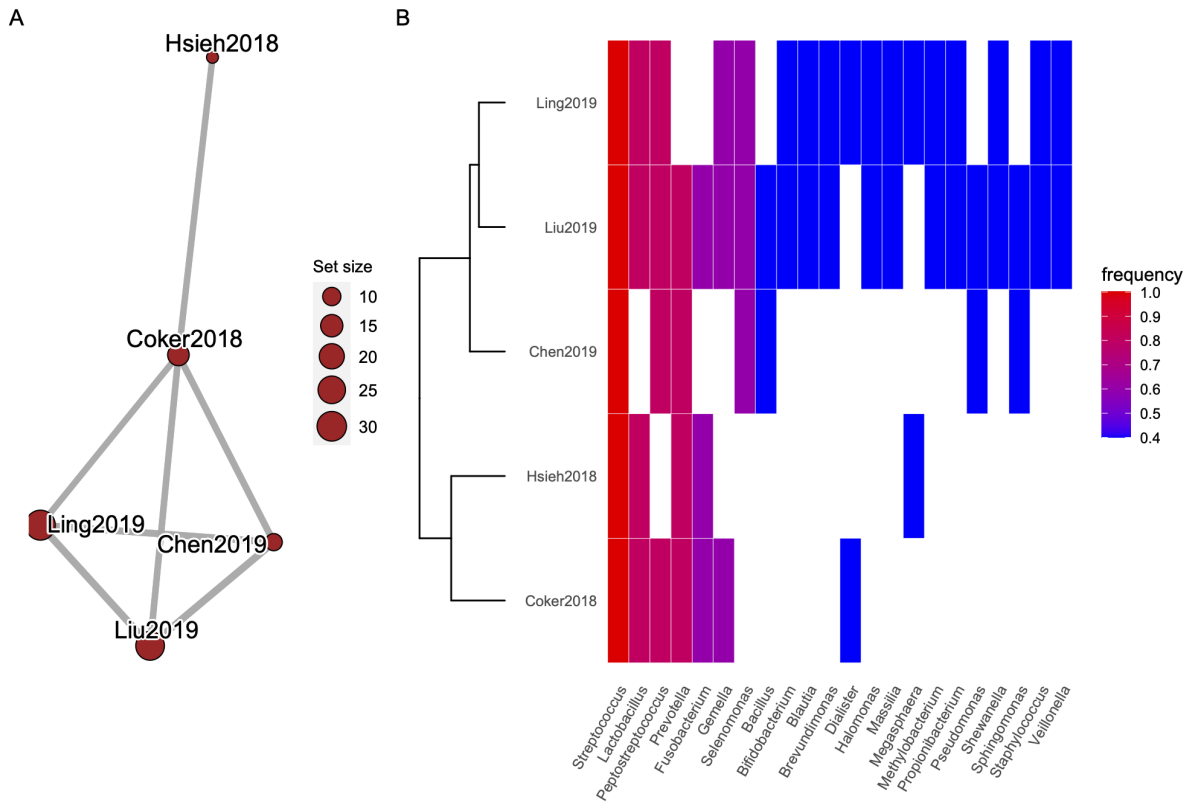

**Figure S8: Similarity between stomach signatures of increased abundance in patients with gastric cancer.** (A) Semantic similarity between signatures. Each node corresponds to a signature. The size of each node is proportional to the number of taxa in a signature. More similar signatures are connected by shorter and thicker edges. (B) Microbial contents of the signatures (*x*-axis) delineating the taxa contained in these signatures (*y*-axis).

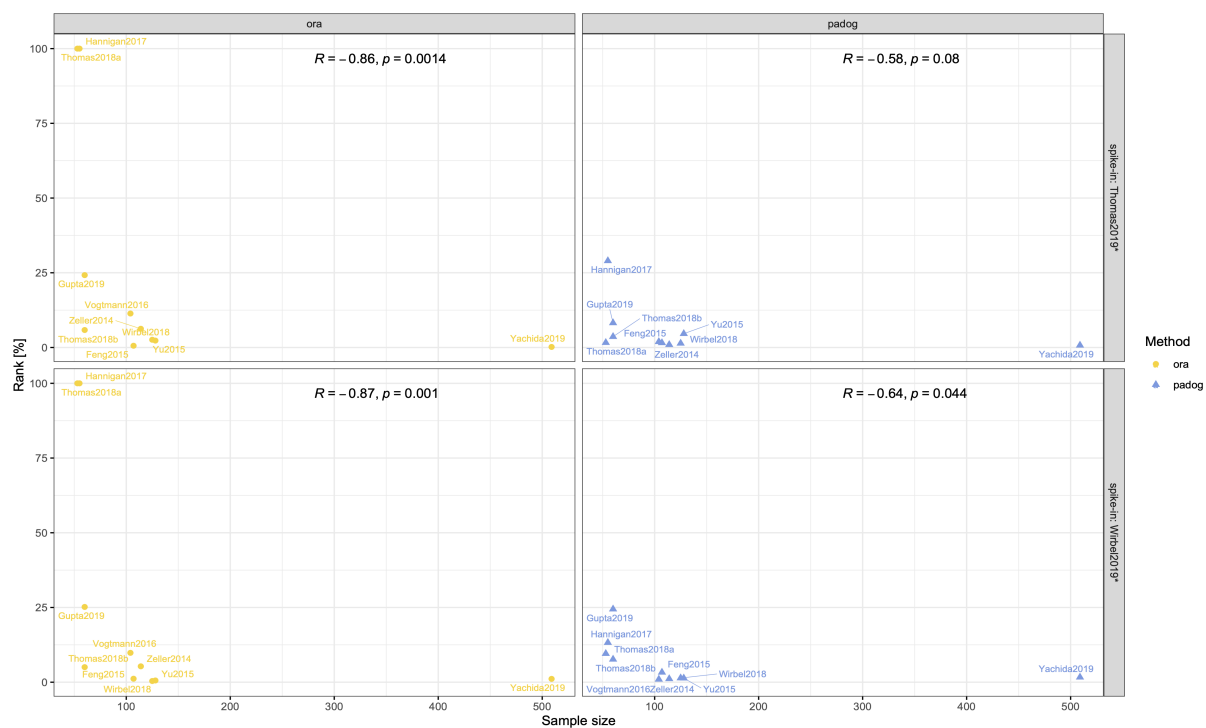

**Figure S9: Relationship between sample size and ranking of spike-in signatures.** Relative ranks ( $y$ -axis) of both spike-in signatures for ORA and PADOG when applied to 10 published metagenomic datasets of varying sample size ( $x$ -axis). The correlation and  $p$ -value of Spearman's correlation test is annotated to each panel. A general trend of better ranking of the spike-in signatures for larger sample sizes is apparent for both methods, although the impact of lack in power for smaller sample sizes is stronger for ORA.

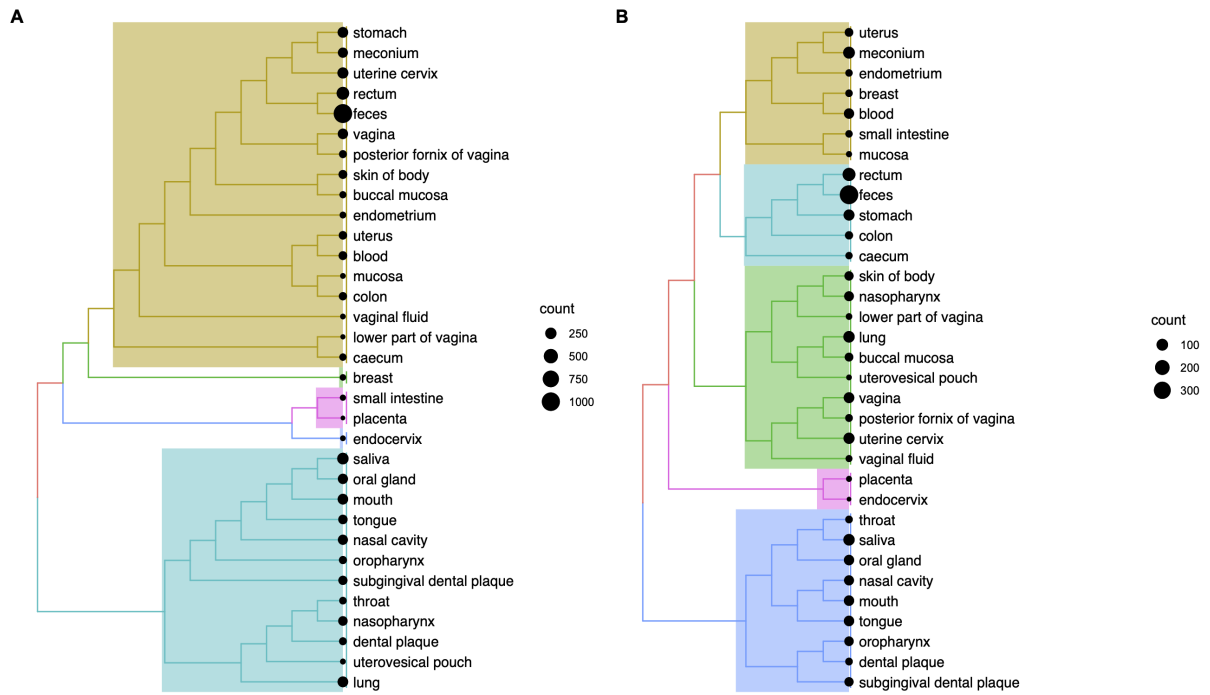

**Figure S10: Clustering of consensus signatures for body site.** (A) Clustering of weighted meta-signatures containing mixed taxonomic levels by semantic similarity [6], and (B) Clustering of weighted genus-level signatures by rank-biased overlap [7].



**Table S1: Body areas and anatomical sites.** Microbiome studies in BugSigDB investigate microbiome samples from 14 broad body areas comprising more than 60 refined anatomical sites standardized based on the UBERON Anatomy Ontology [8].

| Body area         | Anatomical site           | UBERON ID      |
|-------------------|---------------------------|----------------|
| Oral              | Mouth                     | UBERON:0000165 |
|                   | Lower lip                 | UBERON:0001835 |
|                   | Buccal mucosa             | UBERON:0006956 |
|                   | Oral cavity               | UBERON:0000167 |
|                   | Oral opening              | UBERON:0000166 |
|                   | Oropharynx                | UBERON:0001729 |
|                   | Pharyngeal mucosa         | UBERON:0000355 |
|                   | Saliva                    | UBERON:0001836 |
|                   | Tongue                    | UBERON:0001723 |
|                   | Gingiva                   | UBERON:0001828 |
|                   | Internal cheek pouch      | UBERON:0013640 |
|                   | Dental plaque             | UBERON:0016482 |
|                   | Subgingival dental plaque | UBERON:0016484 |
|                   | Throat                    | UBERON:0000341 |
| Hypopharynx       | UBERON:0001051            |                |
| Nasal             | Nose                      | UBERON:0000004 |
|                   | Nasal cavity              | UBERON:0001707 |
|                   | Nasopharynx               | UBERON:0001728 |
| Respiratory tract | Lung                      | UBERON:0002048 |
|                   | Bronchus                  | UBERON:0002185 |
|                   | Sputum                    | UBERON:0007311 |
| Upper GI tract    | Stomach                   | UBERON:0000945 |
|                   | Mucosa of stomach         | UBERON:0001199 |
|                   | Duodenum                  | UBERON:0002114 |
|                   | Duodenal mucosa           | UBERON:0000320 |
| Lower GI tract    | Colon                     | UBERON:0001155 |
|                   | Colonic mucosa            | UBERON:0000317 |
|                   | Intestine                 | UBERON:0000160 |
|                   | Intestinal mucosa         | UBERON:0001242 |
|                   | Large intestine           | UBERON:0000059 |
|                   | Caecum                    | UBERON:0001153 |
|                   | Small intestine           | UBERON:0002108 |
|                   | Mucosa of small intestine | UBERON:0001988 |
|                   | Ileum                     | UBERON:0002116 |
|                   | Rectum                    | UBERON:0001052 |
|                   | Mucosa of rectum          | UBERON:0003346 |
|                   | Feces                     | UBERON:0001988 |
| Meconium          | UBERON:0007109            |                |
| Skin              | Skin of body              | UBERON:0002097 |
|                   | Skin of cheek             | UBERON:0008803 |
|                   | Skin of forearm           | UBERON:0003403 |
|                   | Skin of penis             | UBERON:0001331 |
|                   | Skin of sole of pes       | UBERON:0013778 |
|                   | Interdigital space        | UBERON:0036252 |

|                            |                            |                |
|----------------------------|----------------------------|----------------|
| Vaginal                    | Vagina                     | UBERON:0000996 |
|                            | Lower part of vagina       | UBERON:0015243 |
|                            | Vaginal fluid              | UBERON:0036243 |
|                            | Posterior fornix of vagina | UBERON:0016486 |
| Female reproductive system | Uterus                     | UBERON:0000995 |
|                            | Uterine cervix             | UBERON:0000002 |
|                            | Uterovesical pouch         | UBERON:0011049 |
|                            | Endocervix                 | UBERON:0000458 |
|                            | Endometrium                | UBERON:0001295 |
|                            | Ovary                      | UBERON:0000992 |
|                            | Placenta                   | UBERON:0001987 |
| Male reproductive system   | Prostate gland secretion   | UBERON:0004796 |
|                            | Semen                      | UBERON:0001968 |
| Blood                      | Blood                      | UBERON:0000178 |
| Breast milk                | Milk                       | UBERON:0001913 |
| Urine                      | Urine                      | UBERON:0001088 |
| Lymph node                 | Mesenteric lymph node      | UBERON:0002509 |
| Other                      | Breast tissue              | UBERON:0000310 |
|                            | Peritoneal fluid           | UBERON:0001268 |

**Table S2: Reported measures of alpha diversity.** Shown are the number of experiments that reported one of the indicated alpha diversity measures in the columns with either decreased, increased, or unchanged alpha diversity in the exposed group when compared to the unexposed group.

|           | Shannon | Richness | Chao1 | Simpson | Inverse Simpson | Pielou | Total |
|-----------|---------|----------|-------|---------|-----------------|--------|-------|
| Decreased | 150     | 82       | 98    | 42      | 14              | 11     | 397   |
| Increased | 117     | 93       | 62    | 33      | 6               | 4      | 315   |
| Unchanged | 426     | 235      | 232   | 164     | 30              | 25     | 1122  |
| Total     | 703     | 410      | 392   | 239     | 50              | 40     | 1834  |

**Table S3: Body sites with frequently reported changes in alpha diversity.** Shown are the top 5 body sites most frequently reported with increased (top) or decreased (bottom) alpha diversity in the exposed sample group when compared to the unexposed sample group.

|                            | Increased | Decreased | Unchanged |
|----------------------------|-----------|-----------|-----------|
| Saliva                     | 16        | 6         | 18        |
| Mouth                      | 11        | 2         | 16        |
| Posterior fornix of vagina | 8         | 0         | 3         |
| Uterine cervix             | 9         | 1         | 30        |
| Vagina                     | 9         | 3         | 24        |
| Feces                      | 72        | 132       | 485       |
| Stomach                    | 3         | 15        | 4         |
| Skin of body               | 2         | 7         | 14        |
| Caecum                     | 1         | 4         | 2         |
| Rectum                     | 0         | 2         | 11        |

**Table S4: Conditions with frequently reported changes in alpha diversity.** Shown are the top 5 conditions most frequently reported with increased (top) or decreased (bottom) alpha diversity in the exposed sample group when compared to the unexposed sample group.

|                                 | Increased | Decreased | Unchanged |
|---------------------------------|-----------|-----------|-----------|
| Air pollution                   | 14        | 5         | 9         |
| Human papilloma virus infection | 8         | 1         | 33        |
| Cervical cancer                 | 5         | 0         | 5         |
| Hypertension                    | 4         | 0         | 2         |
| Periodontitis                   | 4         | 0         | 5         |
| COVID-19                        | 7         | 28        | 38        |
| Antimicrobial agent             | 5         | 20        | 39        |
| Gastric cancer                  | 2         | 15        | 16        |
| Chronic kidney disease          | 0         | 5         | 2         |
| Graft versus host disease       | 2         | 7         | 4         |
